# Supplementary material for: Control of striatal circuit development by the chromatin regulator Zswim6
Source: PubMed Central journal article supplement — Sci Adv. 2025 Jan 17;11(3):eadq6663. doi: 10.1126/sciadv.adq6663 (PMC11740973; doi:10.1126/sciadv.adq6663), 2025-01-17
Supplement: sciadv.adq6663_sm.pdf [file sciadv.adq6663_sm.pdf]

Supplementary Materials for  
**Control of striatal circuit development by the chromatin regulator *Zswim6***

Kyuhyun Choi *et al.*

Corresponding author: Marc V. Fuccillo, [fuccillo@penncmedicine.upenn.edu](mailto:fuccillo@penncmedicine.upenn.edu);  
Kyuhyun Choi, [kyuhyun@hallym.ac.kr](mailto:kyuhyun@hallym.ac.kr)

*Sci. Adv.* **11**, eadq6663 (2025)  
DOI: 10.1126/sciadv.adq6663

**This PDF file includes:**

Figs. S1 to S6  
Tables S1 and S2

# Supplementary Figures

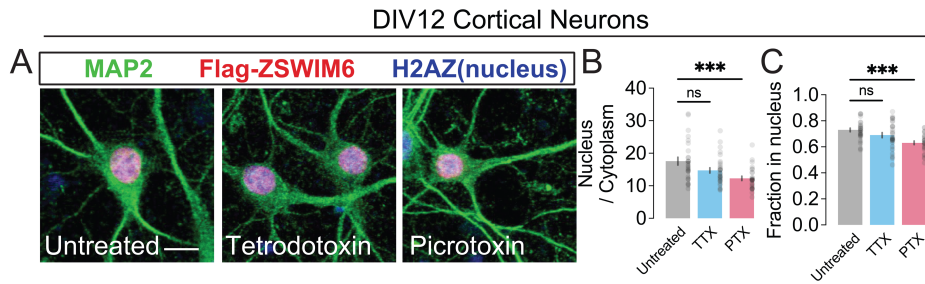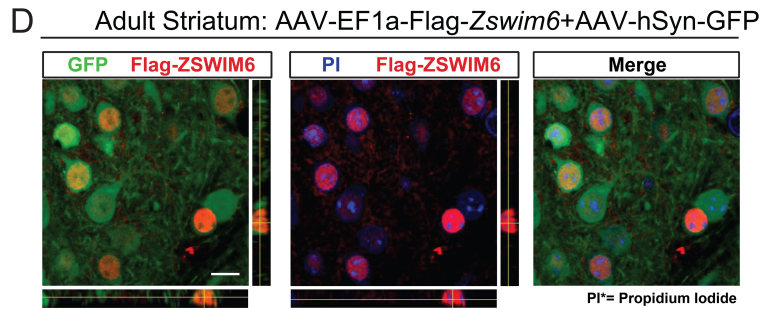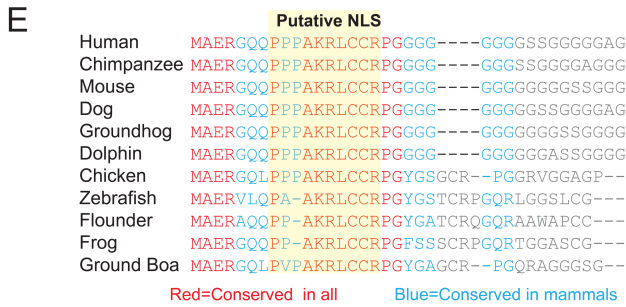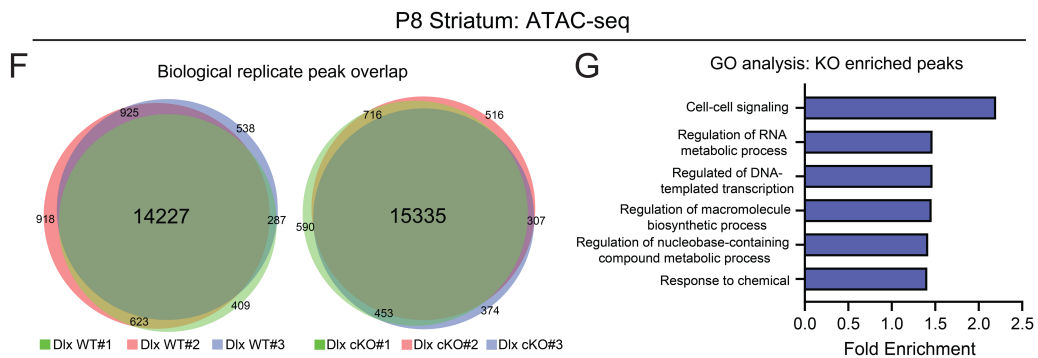

## Figure S1: Nuclear localization and chromatin regulation by ZSWIM6. Related to Figure 1.

(A) Representative images of DIV12 neurons transduced with AAV-Ef1 $\alpha$ -Flag-Zswim6 (red) and immunostained for MAP2 (green) to label cell morphology and H2AZ to label nuclei (blue). Cultures were treated with the indicated reagents for 2 hours. Scale bar, 10  $\mu$ m. (B) Summary data of mean Flag-ZSWIM6 fluorescence intensity (nucleus/cytoplasm ratio) in cells treated with the indicated reagents. (n= 3 cultures for each experimental condition, Untreated n= 27 cells, TTX n=29 cells, PTX n=27 cells, One-way ANOVA,  $F(2, 80) = 8.230$ , \*\*\* $p=0.0006$ , Tukey's post hoc, Untreated-TTX  $p=0.0762$ ; Untreated-PTX \*\*\* $p=0.0003$ ). (C) Quantification of the fraction of Flag-ZSWIM6 intensity localized to the nucleus in cells treated with the indicated reagents (n= 3 cultures for each experimental condition, Untreated n= 27 cells, TTX n=29 cells, PTX n=27 cells, One-way ANOVA,  $F(2,80) = 8.306$ , \*\*\* $p=0.0002$ , Tukey's post hoc, Untreated-TTX  $p=0.1887$ ; \*\*\*\*Untreated-PTX  $p=0.0001$ ). (D) Representative maximum projections of confocal stacks demonstrating the relationship between Flag-ZSWIM6, cell-filling GFP, and the nuclear marker propidium iodide in striatum, following co-injection of AAV-hSyn-GFP and AAV-Ef1 $\alpha$ -Flag-Zswim6. Orthogonal views confirm nuclear localization of ZSWIM6 in the axial plane (scale bar, 10  $\mu$ m). (E) Bioinformatics-based search of a well-conserved predicted nuclear localization sequence (NLS) across multiple species. (F) Overlap of peaks between Dlx-WT/cKO biological replicates demonstrating that the vast majority of peaks are shared between replicates. (G) significantly enriched gene ontology (GO) categories within the 583 TSS regions with  $\geq 1.5$ -fold increase in reads per million in Dlx-cKO vs Dlx-WT striatum.

**A**

| Animal ID  | # nuclei |
|------------|----------|
| Dlx WT #1  | 7514     |
| Dlx WT #2  | 5104     |
| Dlx WT #3  | 5659     |
| Dlx WT #4  | 4480     |
| Dlx cKO #1 | 5186     |
| Dlx cKO #2 | 4737     |
| Dlx cKO #3 | 7326     |
| Dlx cKO #4 | 5726     |

**B**

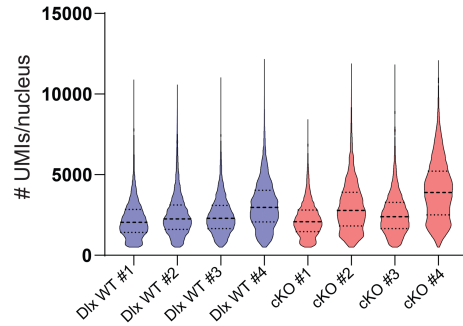

**C**

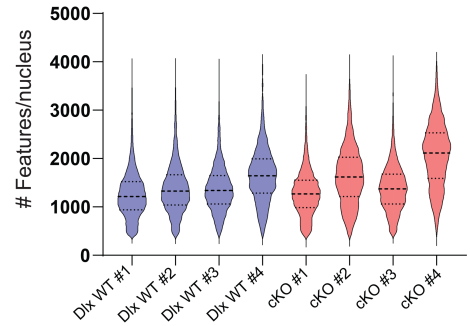

**D**

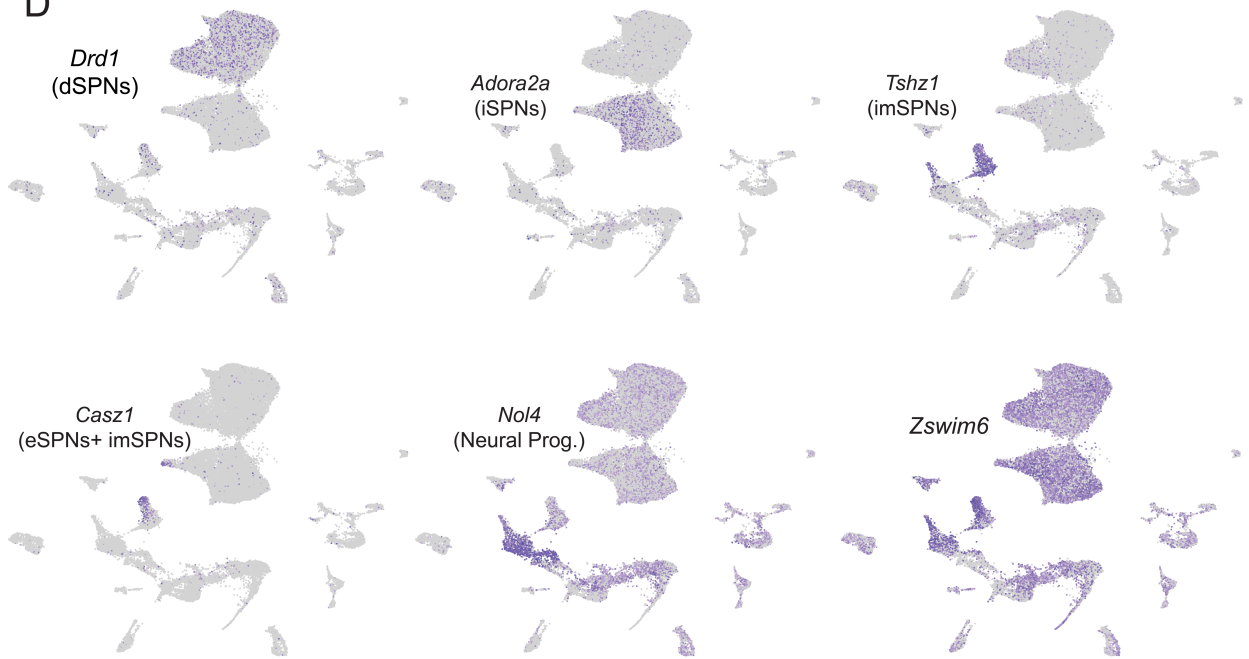

**E**

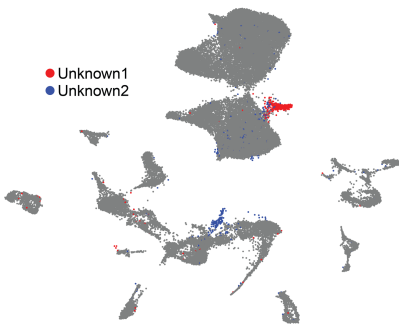

**F**

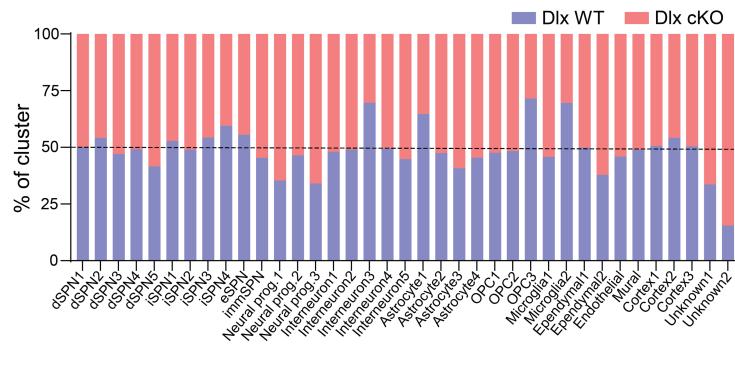



## **Figure S2: snRNA-seq sample and Seurat cluster information. Related to Figure 2.**

(A) Number of nuclei (pre-filtered to remove doublets) in each of the 8 animals included in the snRNA-seq experiment. (B) Number of unique molecular identifiers (UMIs) per nucleus in each experimental sample (violin plots indicate median, 25th and 75th quartiles). (C) Number of identified features (genes) per nucleus in each experimental sample. (D) Seurat-generated “Feature plots”, displaying expression levels of selected cell markers (purple) on the UMAP plot displayed in Fig. 2. (E) Two clusters corresponding to unidentified cell types show in UMAP space. (F) Percentage of Dlx-WT/cKO nuclei in each Seurat cluster. Dashed line indicates 50%. Violin plots indicate median, 25th and 75th quartiles.

## SPN Morphology

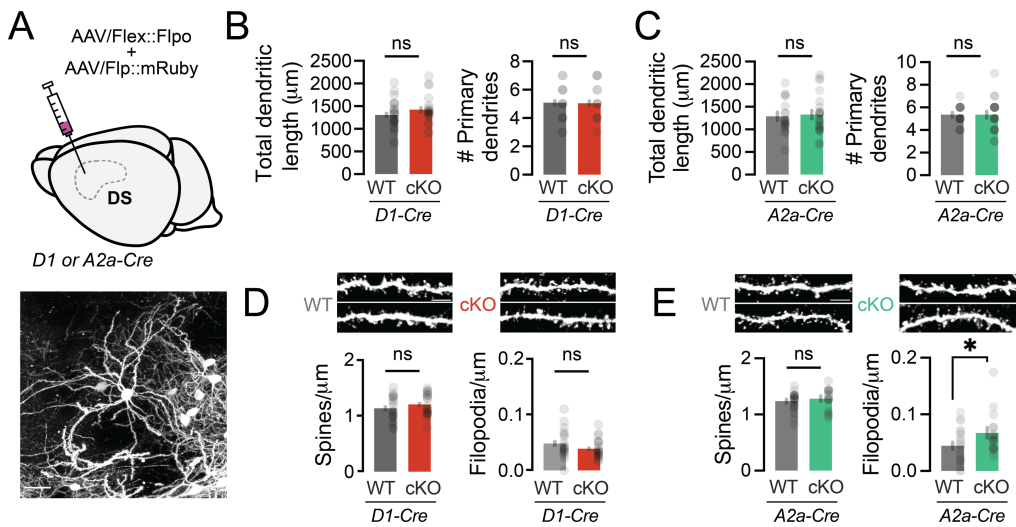

## Spontaneous inhibitory transmission

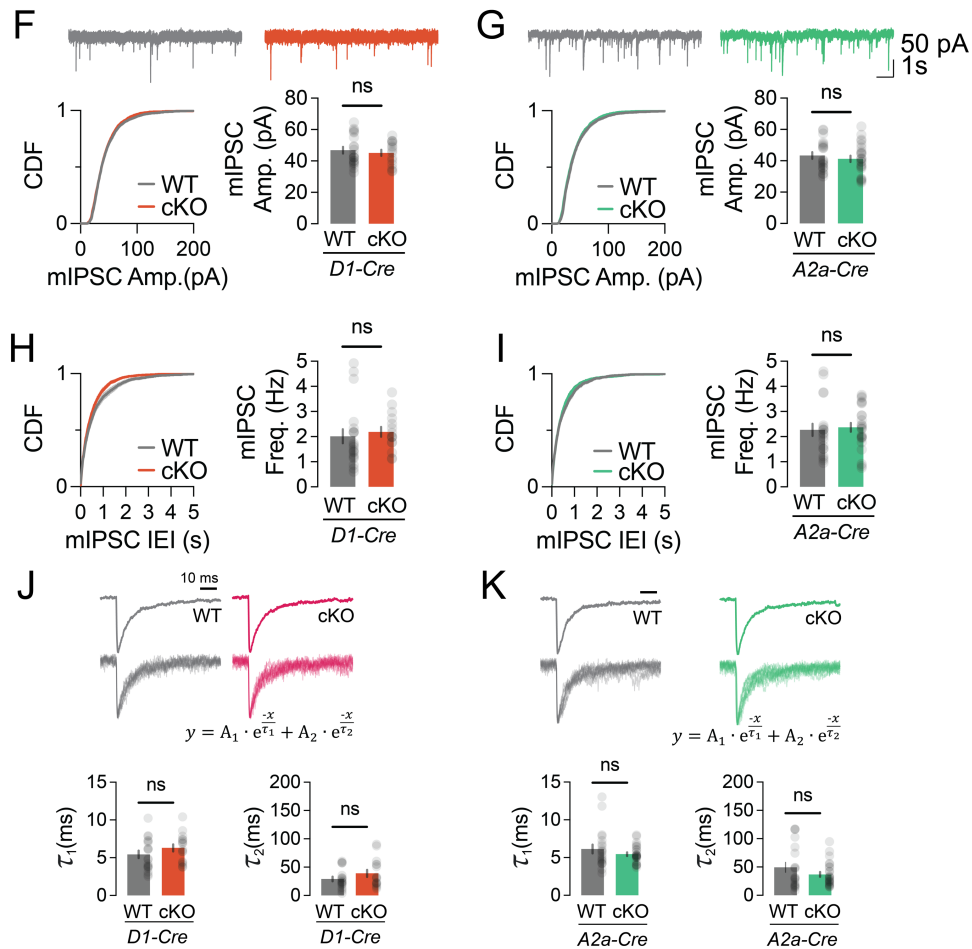

**Figure S3: Neuronal morphology and inhibitory synaptic transmission onto SPNs were not significantly altered by *Zswim6* knockout. Related to Figure 3.**

(A) Schematic of dual virus injection strategy to achieve sparse labeling of Cre-expressing SPNs (top). Representative image of an iSPN expressing mRuby following the injection strategy above (bottom). Scale bar, 30  $\mu\text{m}$ . (B) Quantification of total dendritic length (left) and number of primary dendrites (right) in D1-WT/cKO SPNs ( $n=3/3$  animals, D1-WT/cKO  $n=24/19$  cells. Dendritic length,  $p=0.2552$ ; primary dendrite number,  $p=0.9315$ ,  $t$ -test). (C) Quantification of total dendritic length (left) and number of primary dendrites (right) in A2A-WT/cKO SPNs ( $n=3/3$  animals, A2A-WT/cKO  $n=17/22$  cells. Dendritic length,  $p=0.7647$ ; primary dendrite number,  $p=0.9781$ ,  $t$ -test). (D) Quantification of dendrite spine density (left) and filopodia density in D1-WT and D1-cKO neurons ( $n=3/3$  animals, D1-WT/cKO  $n=18/20$  cells. Spine density,  $p=0.3271$ ; filopodia density,  $p=0.1988$ ,  $t$ -test). (E) Quantification of dendrite spine density (left) and filopodia density in A2A-WT and A2A-cKO neurons ( $n=3/3$  animals, A2A-WT/cKO  $n=22/16$  cells. Spine density,  $p=0.4454$ ; filopodia density,  $*p=0.0428$ ,  $t$ -test). Scale bars in (D-E), 5  $\mu\text{m}$ . (F) Representative mIPSC traces from both D1-WT/cKO (top) neurons. Scale bar, 1s, 50pA. Cumulative distribution function graph of mIPSC amplitudes (bottom-left) and comparison of average mIPSC amplitudes (bottom-right) between D1-WT/cKO neurons ( $n=20/15$  cells from 4/4 animals;  $p=0.5948$ ,  $t$ -test). (G) Similar to (F), but for A2A-WT/cKO ( $n=20/24$  cells from 4/5 animals,  $p=0.4620$ ,  $t$ -test). (H) Cumulative distribution function graph of mIPSC inter-event interval (left) and comparison of events frequencies (right) between D1-WT and D1-cKO neurons ( $n=20/15$  cells from 4/4 animals,  $p=0.6364$ ,  $t$ -test). (I) Similar to (H), but for A2A-WT/cKO ( $n=20/24$  cells from 4/5 animals,  $p=0.7296$ ,  $t$ -test). (J) Averaged and scaled superimposed traces of mIPSCs from D1-WT/cKO (top) neurons. Comparison of  $\tau_1$  and  $\tau_2$  decay constants obtained from fitting mIPSC traces to a double exponential function (bottom) ( $n=19/15$  cells from 4/4 animals,  $\tau_1$   $p=0.3151$ ,  $\tau_2$   $p=0.2435$   $t$ -test). (K) Similar to (J), but for A2A-WT/cKO ( $n=20/24$  cells from 4/5 animals,  $\tau_1$   $p=0.2669$ ,  $\tau_2$   $p=0.1831$ ,  $t$ -test). Data are presented as mean  $\pm$  SEM. Each shaded dot represents data from an individual experiment, unless otherwise noted.

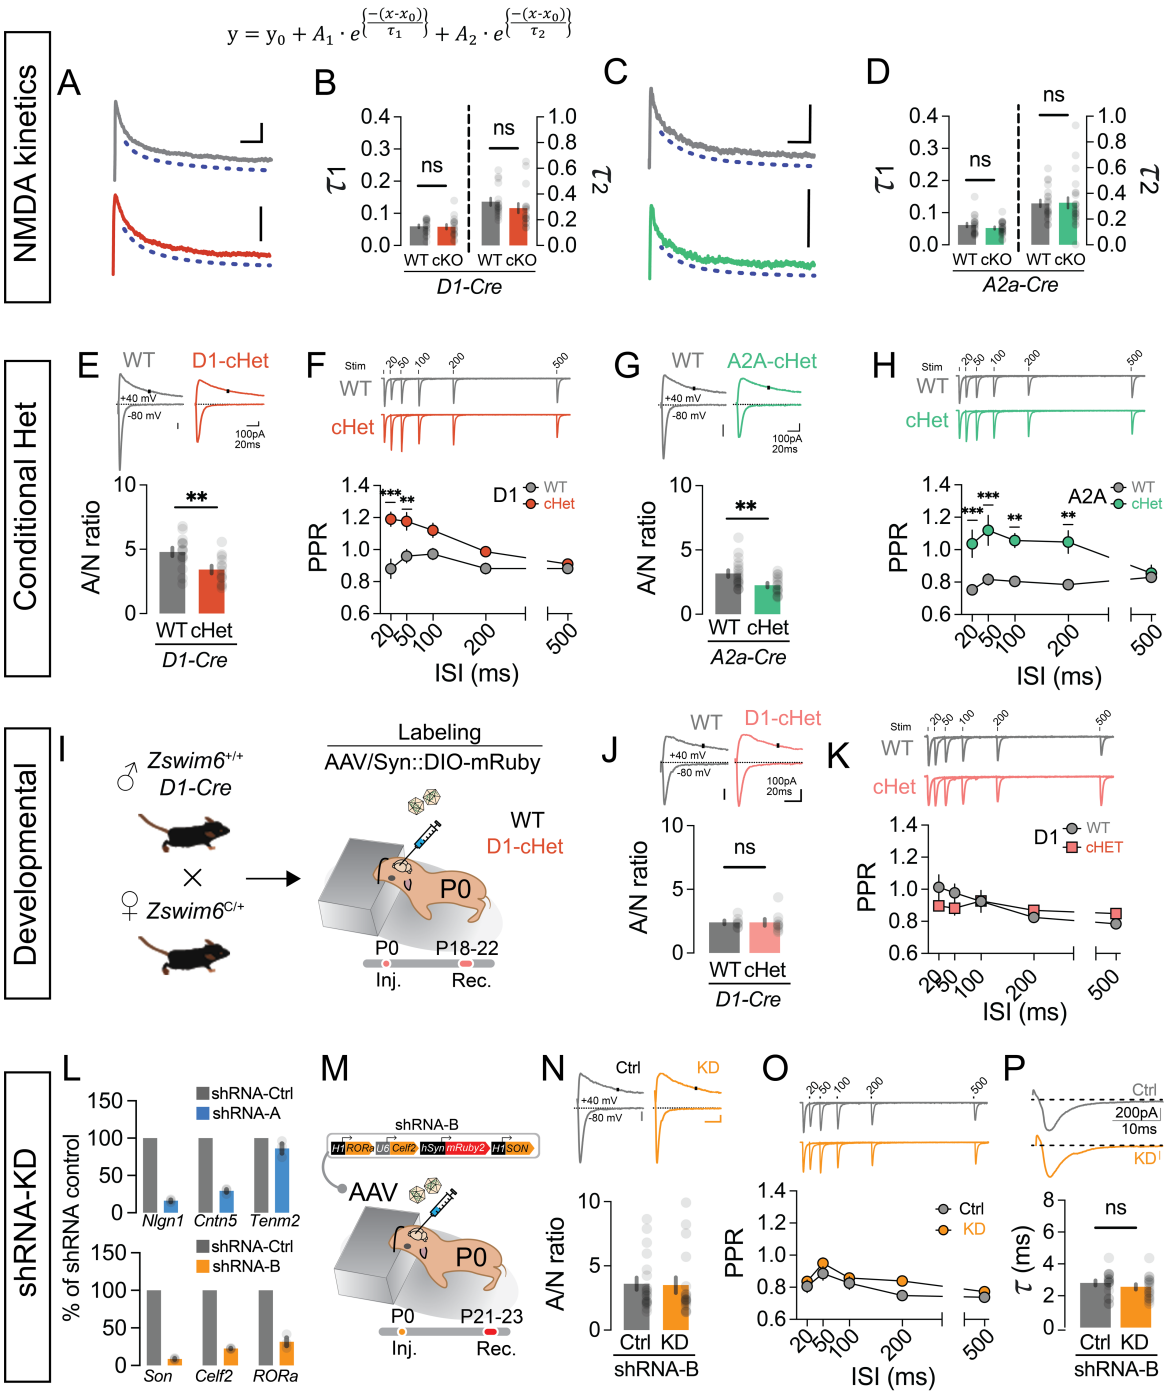

## Figure S4: Examination of NMDAR function, *Zswim6* gene dosage effects and analysis of dysregulated genes downstream of *Zswim6* disruption. Related to Figure 4.

(A) Representative traces at +40 mV holding potential for NMDA currents are presented for D1-WT/cKO (bottom) neurons. (B) Bar graphs display the decay constants ( $\tau_1$  and  $\tau_2$ ) of NMDA components derived from both D1-WT/cKO animals. The fitting was performed using a double exponential function. (n=19/17 cells from 5/5 animals,  $\tau_1$  p=0.8732;  $\tau_2$  p=0.3026, *t*-test). Scale bar, 50 ms 100 pA. Solid line represents the raw trace, while the blue-dotted line represents the model inferred trace. C-D) Similar to (A), but for A2A-WT/cKO (n=20/23 cells from 5/5 animals,  $\tau_1$  p=0.1994,  $\tau_2$  p=0.9126, *t*-test). (E) Representative traces of evoked EPSCs from D1-WT/cHet neurons obtained with cells clamped at +40 mV and -80 mV in order to determine AMPA/NMDA ratio (top). Summary data of AMPA/NMDA ratio in D1-WT and D1-cHet neurons (bottom, n= 15/13 cells from 3/4 animals, \*\*p=0.0050, *t*-test). (F) Representative traces of evoked EPSCs D1-WT/cHet neurons obtained during paired-pulse protocol (top). Summary data of paired pulse ratio in D1-WT and D1-cHet neurons (bottom, n= 17/20 cells from 3/4 animals, RM-2way ANOVA, ISI F(4,140)=11.65, \*\*\*p= 3.417×10<sup>-8</sup>, Genotype F(1,35)=15.12, \*\*\*p= 4.309×10<sup>-4</sup>, Interaction F(4,140)=5.822, \*\*p=0.002). (G) Similar to (E), but for A2A-WT/cHet (n= 18/15 cells from 5/3 animals, \*\*p=0.0082, *t*-test). (H) Similar to (F), but for A2A-WT/cHet (bottom, n= 19/15 cells from 5/3 animals, RM-2way ANOVA, ISI F(4, 128)=3.535, \*\*p=0.0088, Genotype F(1,32) = 17.53, \*\*p=0.002, Interaction F(4,128) = 3.899, \*\*p=0.005). (I) An illustration of the experimental strategy to evaluate early age knockout. AAV is injected into neonatal WT and *Zswim6*-cHet pups to selectively label knockdown cells, with subsequent synaptic measurements taken at P18-22. (J) Representative traces of evoked EPSCs from D1-WT/cHet neurons during early development. Recordings were obtained with cells voltage-clamped at +40 mV and -80 mV to determine the AMPA/NMDA ratio. (top). Summary data of AMPA/NMDA ratio in D1-WT/cHet neurons (bottom, n= 7/9 cells from 4/4 animals, p=0.9964, *t*-test). (K) Representative traces of evoked EPSCs D1-WT/cHet neurons obtained during paired-pulse protocol (top). Summary data of paired pulse ratio in D1-WT/cHet neurons (bottom, n= 17/20 cells from 3/4 animals, RM-2way ANOVA, ISI F(4,60)=7.753, \*\*\*p= 4.186×10<sup>-5</sup>, Genotype F(1,15)=0.2103, p= 0.6531, Interaction F(4,60)=3.615, \*\*p=0.01). (L) qPCR validation of AAV mediated shRNA efficiency (top, shRNA-A; bottom, shRNA-B). Each data point for shRNA-A and shRNA-B groups is displayed as a percentage of expression level of the corresponding gene in shRNA-Control transduced neurons from the same batch of cultures. (M) An illustration of the shRNA-B approach. shRNA AAV vectors (*RORa*, *Celf2*, *Son*) are injected into neonatal CD1 pups to selectively knock down gene expression, with subsequent synaptic measurements taken at P21-P23. (N-P) Representative traces (top) along with a comparison of the (N) AMPA/NMDA ratio (n= 20/18 cells from 4/4 animals, p=0.8819, *t*-test) or (M) PPR (n= 20/17 cells from 4/4 animals, RM-2way ANOVA, ISI F(4,140)=14.16, p< 9.97×10<sup>-10</sup>, shRNA F(1,35)=1.955, p=0.1708, Interaction F(4,140) = 0.6908, p=0.5995) or (P)  $\tau$  (n= 20/18 cells from 4/4 animals, p=0.8819, *t*-test) between mice injected with control shRNA and mice injected with shRNA-B. Data are presented as mean ± SEM. Each shaded dot represents data from an individual experiment, unless otherwise noted. Significance from Šídák's post-hoc test for RM-2way ANOVA.

Excitability

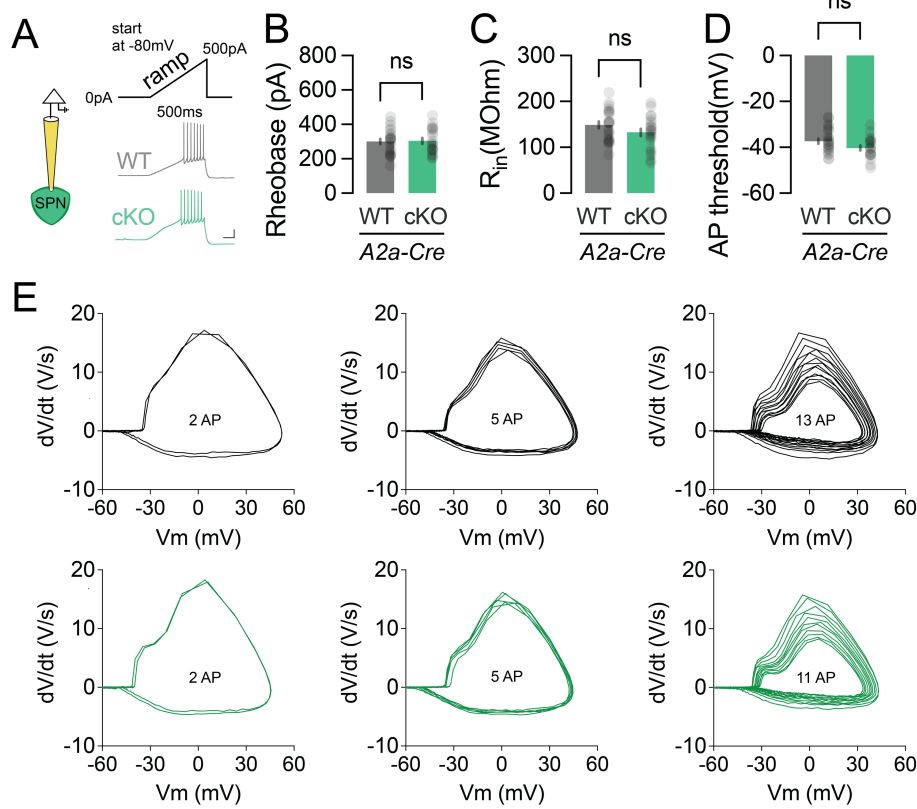

Behavior segmentation

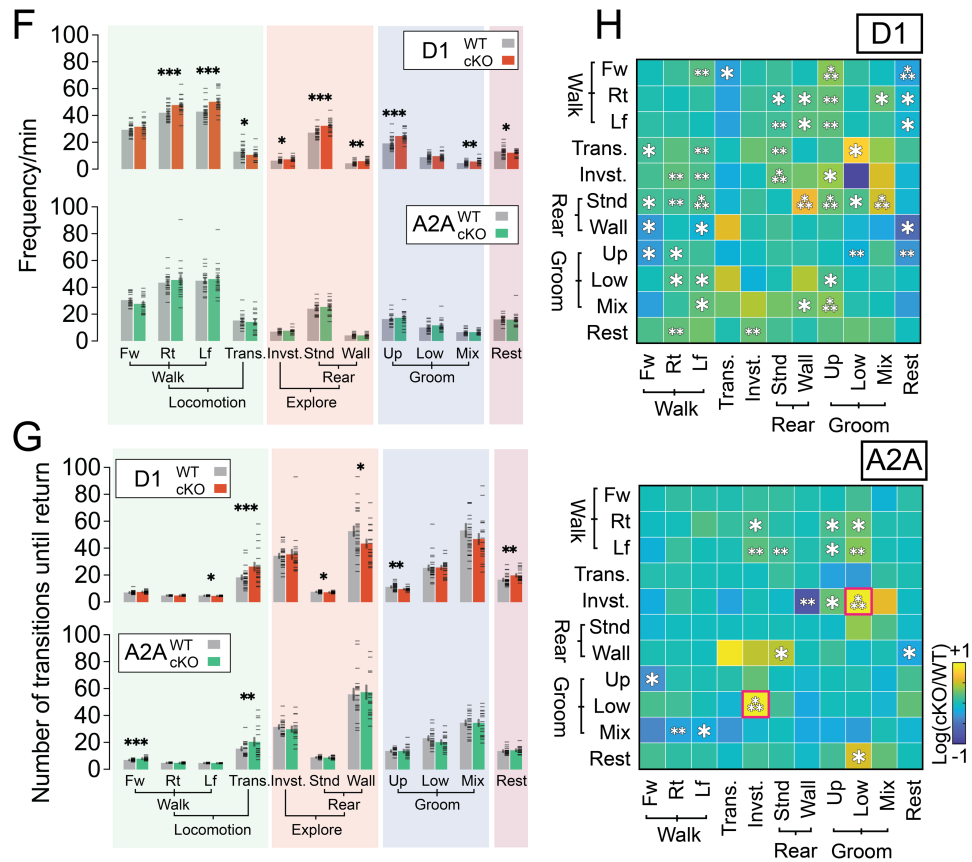

**Figure S5: Additional analyses of passive membrane properties and spontaneous behavior in SPN-specific *Zswim6* cKOs. Related to Figure 5.**

(A) Protocol for assessing intrinsic membrane properties and excitability in SPNs. (B) Summary data comparing rheobase between A2A-WT/cKO SPNs (n= 23/19 cells from 5/4 animals, p=0.7414, *t*-test). (C) Summary data comparing input resistance between A2A-WT/cKO SPNs (n= 23/19 cells from 5/4 animals, p=0.2210, *t*-test). (D) Summary data comparing action potential threshold between A2A-WT/cKO SPNs (n= 23/19 cells from 5/4 animals, p=0.0632, *t*-test). (E) dV/dt firing curves from A2A-WT and A2A-cKO, showing when 2, 5, and 11(13) action potentials occurred. (F) Frequency of each behavioral cluster from D1-WT/cKO (top) and A2A-WT/cKO (bottom) (bootstrap BCa test). (G) Number of transitions until return of each behavioral cluster from D1-WT/cKO (top) and A2A-WT/cKO (bottom) (bootstrap BCa test). (H) Log-scaled comparison of transition matrix ratios between WT and cKO groups. The upper panel represents the data for D1-WT/cKO mice, while the lower panel represents the data for A2A-WT/cKO mice (See Table. S1 to see detailed statistics).

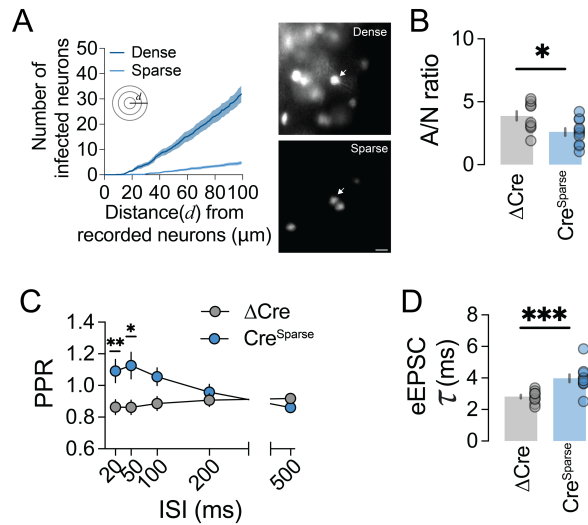

**Figure S6: Sparse expression of Cre phenocopies the effects of dense Cre expression. Related to Figure 6.**

(A) Cumulative frequency distribution of neuronal density expressing Cre-GFP between full titer (Dense, Figure 6) and 1/10 titer (Sparse, Figure S6) (left, mean  $\pm$  SEM represented as thick line  $\pm$  shaded area,  $n=9/14$  from 3/3 animals, Repeated Two-way ANOVA, titer  $F(1,21)=79.71$ ,  $***p=1.3574 \times 10^{-8}$ , distance  $F(99,2079)=135.81$ ,  $***p < 1 \times 10^{-12}$ , Interaction  $F(99,2079)=73.14$ ,  $***p < 1 \times 10^{-12}$ ). Captured images obtained from each viral titer configuration (right).

(B) AMPA/NMDA ratio ( $n=10/11$  cells from 3/3 animals,  $p=0.0126$ ,  $t$ -test) or (C) PPR ( $n=11/8$  cells, RM-2way ANOVA,  $F(3.294, 55.99) = 4.844$ ,  $**p < 0.003$ , Cre  $F(1, 17) = 7.453$ ,  $*p = 0.014$ , Interaction  $F(4, 68) = 10.59$ ,  $***p = 9.988 \times 10^{-9}$ ) or (D)  $\tau$  ( $n=11/11$  cells,  $***p = 0.0002$ ,  $t$ -test) between mice injected with  $\Delta$ Cre-GFP and mice injected with 1/10 Cre. Data are presented as mean  $\pm$  SEM. Each shaded dot represents data from an individual experiment, unless otherwise noted. Significance from Šídák's *post-hoc* test for RM-2way ANOVA.



| <i>D1-Cre</i> |        | Walk         |              |              |              | Explore      |              |              | Groom        |              |              | Rest         |
|---------------|--------|--------------|--------------|--------------|--------------|--------------|--------------|--------------|--------------|--------------|--------------|--------------|
|               |        | Fw           | Rt           | Lf           | Trans.       | Invst.       | Stand        | Wall         | Upper        | Lower        | Mix          |              |
| Walk          | Fw     |              | 0.057<br>128 | 0.001<br>48  | 0.011<br>039 | 0.232<br>821 | 0.119<br>51  | 0.285<br>367 | 2.54E-<br>05 | 0.318<br>013 | 0.499<br>396 | 9.57E-<br>05 |
|               | Rt     | 0.318<br>975 |              | 0.209<br>034 | 0.063<br>127 | 0.303<br>965 | 0.039<br>788 | 0.033<br>281 | 0.002<br>963 | 0.491<br>999 | 0.041<br>596 | 0.049<br>217 |
|               | Lf     | 0.058<br>32  | 0.261<br>537 |              | 0.156<br>029 | 0.064<br>926 | 0.007<br>945 | 0.045<br>609 | 0.001<br>888 | 0.381<br>495 | 0.078<br>161 | 0.036<br>995 |
|               | Trans. | 0.032<br>15  | 0.000<br>403 | 0.009<br>098 |              | 0.012<br>335 | 0.006<br>05  | 0.470<br>485 | 0.050<br>485 | 0.027<br>851 | 0.174<br>118 | 0.052<br>394 |
| Explore       | Invst. | 0.066<br>078 | 0.002<br>158 | 0.005<br>5   | 0.058<br>655 |              | 0.000<br>372 | 0.212<br>731 | 0.011<br>493 | 0.127<br>082 | 0.082<br>134 | 0.096<br>333 |
|               | Stand  | 0.049<br>945 | 0.001<br>277 | 0.000<br>167 | 0.326<br>951 | 0.133<br>963 |              | 4.98E-<br>06 | 1.24E-<br>05 | 0.047<br>325 | 1.33E-<br>05 | 0.102<br>919 |
|               | Wall   | 0.012<br>573 | 0.430<br>226 | 0.034<br>437 | 0.110<br>146 | 0.350<br>713 | 0.108<br>092 |              | 0.264<br>108 | 0.160<br>662 | 0.103<br>22  | 0.018<br>481 |
| Groom         | Upper  | 0.041<br>737 | 0.033<br>286 | 0.055<br>19  | 0.271<br>772 | 0.176<br>613 | 0.079<br>16  | 0.300<br>938 |              | 0.009<br>927 | 0.114<br>958 | 0.002<br>798 |
|               | Lower  | 0.435<br>25  | 0.011<br>74  | 0.012<br>707 | 0.115<br>437 | 0.170<br>719 | 0.361<br>425 | NaN          | 0.049<br>142 |              | 0.379<br>415 | 0.191<br>982 |
|               | Mix    | 0.371<br>606 | 0.371<br>499 | 0.034<br>713 | 0.224<br>05  | 0.125<br>57  | 0.164<br>747 | 0.014<br>867 | 4.96E-<br>05 | 0.453<br>393 |              | 0.195<br>372 |
|               | Rest   | 0.258<br>29  | 0.001<br>489 | 0.000<br>162 | 0.368<br>937 | 0.004<br>887 | 0.054<br>676 | 0.304<br>564 | 0.117<br>88  | 0.171<br>784 | 0.238<br>115 |              |

**Table S1: Detailed statistics relating to Figure S5C.** p-value summary of transition matrix from *D1-Cre* mice (bootstrap test). Colored boxes indicate p-value <0.05.

| <i>A2a-Cre</i> |        | Walk         |              |              |              | Explore      |              |              | Groom        |              |              |      |
|----------------|--------|--------------|--------------|--------------|--------------|--------------|--------------|--------------|--------------|--------------|--------------|------|
|                |        | Fw           | Rt           | Lf           | Trans.       | Invst.       | Stand        | Wall         | Upper        | Lower        | Mix          | Rest |
| Walk           | Fw     | 0.130<br>797 | 0.448<br>155 | 0.287<br>633 | 0.180<br>879 | 0.172<br>51  | 0.351<br>838 | 0.271<br>004 | 0.430<br>023 | 0.173<br>594 | 0.360<br>051 |      |
|                | Rt     | 0.252<br>331 | 0.116<br>477 | 0.337<br>334 | 0.045<br>058 | 0.262<br>632 | 0.155<br>44  | 0.016<br>488 | 0.030<br>636 | 0.360<br>577 | 0.488<br>299 |      |
|                | Lf     | 0.008<br>693 | 0.283<br>128 | 0.323<br>319 | 0.001<br>594 | 0.003<br>944 | 0.181<br>334 | 0.013<br>086 | 0.005<br>141 | 0.336<br>125 | 0.127<br>802 |      |
|                | Trans. | 0.355<br>294 | 0.500<br>066 | 0.451<br>211 | 0.467<br>864 | 0.172<br>545 | 0.333<br>787 | 0.173<br>145 | 0.270<br>263 | 0.311<br>984 | 0.462<br>796 |      |
| Explore        | Invst. | 0.132<br>157 | 0.167<br>804 | 0.482<br>885 | 0.022<br>74  | 0.243<br>102 | 0.004<br>388 | 0.015<br>342 | 2.32E-<br>08 | 0.166<br>934 | 0.214<br>081 |      |
|                | Stand  | 0.163<br>739 | 0.300<br>455 | 0.398<br>894 | 0.305<br>323 | 0.474<br>772 | 0.184<br>034 | 0.442<br>935 | 0.068<br>391 | 0.093<br>65  | 0.114<br>321 |      |
|                | Wall   | 0.415<br>894 | 0.448<br>91  | 0.374<br>82  | 0.108<br>023 | 0.174<br>096 | 0.014<br>179 | 0.070<br>704 | 0.456<br>067 | 0.434<br>431 | 0.030<br>341 |      |
| Groom          | Upper  | 0.030<br>477 | 0.420<br>167 | 0.471<br>61  | 0.465<br>026 | 0.057<br>781 | 0.420<br>57  | 0.191<br>815 | 0.158<br>943 | 0.436<br>015 | 0.225<br>883 |      |
|                | Lower  | 0.184<br>994 | 0.494<br>413 | 0.428<br>906 | 0.462<br>397 | 1.25E-<br>08 | 0.268<br>921 | 0.120<br>167 | 0.297<br>734 | 0.384<br>874 | 0.366<br>721 |      |
|                | Mix    | 0.296<br>651 | 0.009<br>681 | 0.046<br>175 | 0.110<br>031 | 0.469<br>892 | 0.329<br>013 | 0.094<br>009 | 0.175<br>669 | 0.116<br>118 | 0.115<br>318 |      |
|                | Rest   | 0.090<br>728 | 0.222<br>122 | 0.278<br>608 | 0.151<br>896 | 0.099<br>229 | 0.219<br>779 | 0.058<br>639 | 0.146<br>402 | 0.047<br>226 | 0.287<br>866 |      |

**Table S1 (continued): Detailed statistics relating to Figure S5C.** p-value summary of transition matrix from *A2a-Cre* mice (bootstrap test). Colored boxes indicate p-value <0.05.

| <b>Primer name</b>    | <b>Primer sequence</b> |
|-----------------------|------------------------|
| <i>Actb</i> _Forward  | CGCAGCCACTGTCGAGTC     |
| <i>Actb</i> _Reverse  | GTCATCCATGGCGAACTGGT   |
| <i>Hprt</i> _Forward  | AGTCCCAGCGTCGTGATTAG   |
| <i>Hprt</i> _Reverse  | TGATGGCCTCCCATCTCCTT   |
| <i>Nlgn1</i> _Forward | CCCCATGATTGGCCCTACAG   |
| <i>Nlgn1</i> _Reverse | TGGTTGATTTGGGTCACCAG   |
| <i>Cntn5</i> _Forward | CATTGCCTGGGAGCCAGTAT   |
| <i>Cntn5</i> _Reverse | GCCTCCGAAGACGTAACCAT   |
| <i>Tenm2</i> _Forward | AAACCGAGTCACAGACCTGG   |
| <i>Tenm2</i> _Reverse | CAGGGTGAAGTTTGTCCCTTGT |
| <i>Son</i> _Forward   | AAAAAGTCTGGAGGAGCTACCA |
| <i>Son</i> _Reverse   | AGGAGGTCTTCTTCTCTTCA   |
| <i>Celf2</i> _Forward | ATGTTTGAGCGCACTTCTGA   |
| <i>Celf2</i> _Reverse | TCCGTTTCATCTTGTGGCTGT  |
| <i>Rora</i> _Forward  | CGAAGAAGACACACACATCTCA |
| <i>Rora</i> _Reverse  | CAGGAGTAGGTGGCATTGCT   |

**Table S2:** List of primer sequences used for qPCR.
